# Supplementary material
Source: Research Square preprint supplement (doi:10.21203/rs.3.rs-9183601/v1)
Supplement: Supplementary file 2 [file ae6c2a3299456f5a6d40ba52.docx]

The Mendeley Data file is stored in draft format with:

Çelik, Bekir; Rahman, Mohammad Nadimur (2026), “**Biocapacity-based assessment of trade openness and environmental quality in G20 countries**”, Mendeley Data, V1, doi: 10.17632/hvcgjvrsc6.1
