# Supplementary material
Source: Research Square preprint supplement (doi:10.21203/rs.3.rs-9183601/v1)

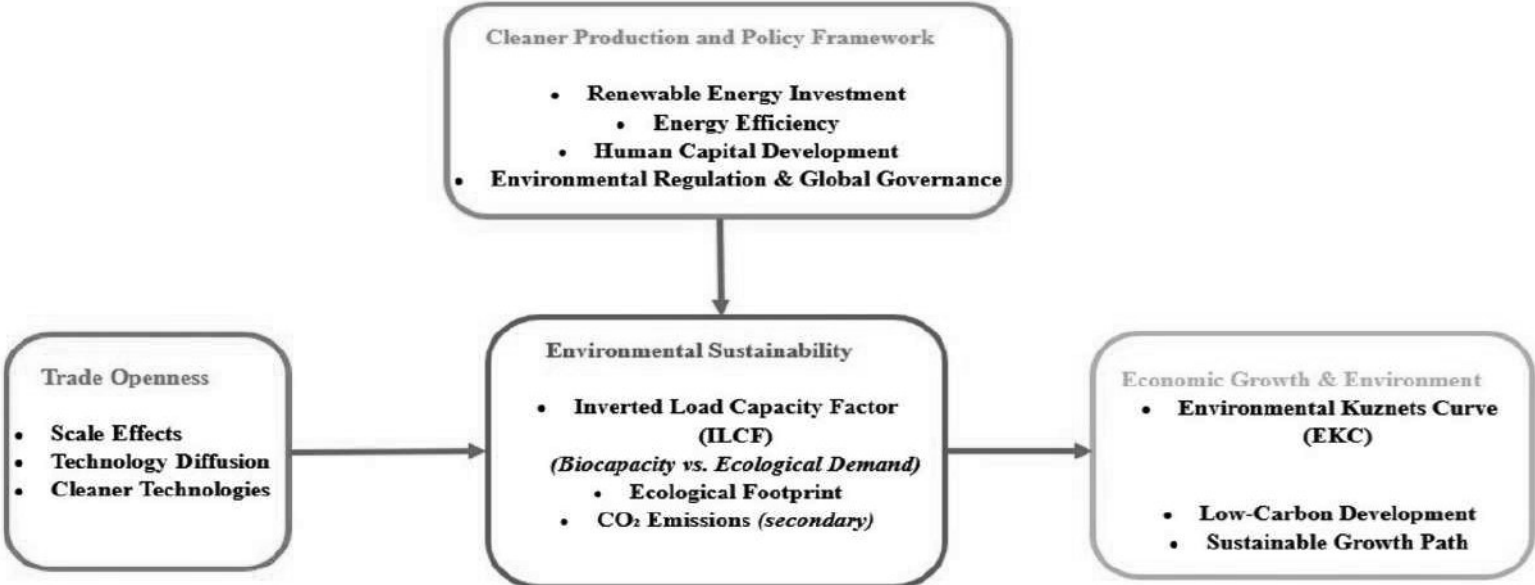

Supplement: Supplementary file 1 [file 9356388bd5290566706ce2ad.pdf]
